# Supplementary material
Source: publisher figshare collection journal article supplement (https://frontiersin.figshare.com/ndownloader/files/21787587)
Supplement: Supplementary file [file 21787587]

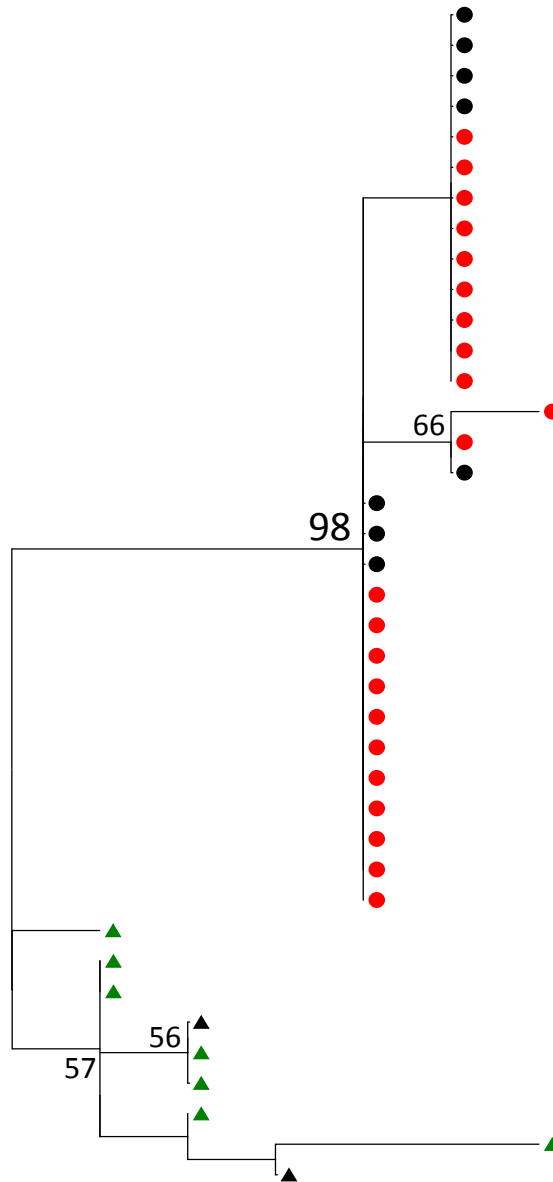

**Supplementary Figure S4 . Maximal likelyhood phylogenetic tree constructed with concatenated sequences of *P. vivax* ookinete specific-genes from southern Mexico.** Twenty nine sequences comprising 2478bp from this study plus 10 sequences obtained from PlasmoDB (in black); this ML tree did not comprise SNP at codon 1754 of CTRP. It shows two main branches supported by 98% bootstrapping similar to Figure 1. Bootstrapping above 50% are shown.
